# Supplementary material
Source: PubMed Central journal article supplement (PMC2268170)
Supplement: supp_0712188105_12188Table6.pdf [file supp_0712188105_12188Table6.pdf]

**Table 6.** The ability of the proposed scoring scheme to distinguish the correct motifs from incorrect ones.

| TF                 | top-1 score   | top-2 score | Comments                                                                                                                                                                                                                                                                                            |
|--------------------|---------------|-------------|-----------------------------------------------------------------------------------------------------------------------------------------------------------------------------------------------------------------------------------------------------------------------------------------------------|
| ABF1               | <b>8.02</b>   | 0.93        |                                                                                                                                                                                                                                                                                                     |
| ACE2               | <b>0.70</b>   | 0.30        |                                                                                                                                                                                                                                                                                                     |
| BAS1               | <b>4.83</b>   | 1.50        |                                                                                                                                                                                                                                                                                                     |
| CBF1               | <b>16.83</b>  | 5.00        |                                                                                                                                                                                                                                                                                                     |
| CIN5_H2O2Lo        | <b>1.23</b>   | 0.28        |                                                                                                                                                                                                                                                                                                     |
| DIG1               | <b>3.34</b>   | 0.64        |                                                                                                                                                                                                                                                                                                     |
| FHL1               | <b>2.66</b>   | 1.62        |                                                                                                                                                                                                                                                                                                     |
| FKH1               | <b>2.45</b>   | 0.68        |                                                                                                                                                                                                                                                                                                     |
| FKH2               | <b>2.82</b>   | 0.79        |                                                                                                                                                                                                                                                                                                     |
| GAL4_GAL           | <b>6.17</b>   | 2.85        |                                                                                                                                                                                                                                                                                                     |
| HAP1               | <b>2.85</b>   | 0.99        |                                                                                                                                                                                                                                                                                                     |
| HAP4               | <b>2.51</b>   | 1.60        |                                                                                                                                                                                                                                                                                                     |
| HIR1               | <b>3.10</b>   | 2.80        |                                                                                                                                                                                                                                                                                                     |
| HIR2               | <b>8.65</b>   | 8.38        | The top-1 motif is correct, but its score is only slightly better than the top-2 score.                                                                                                                                                                                                             |
| MAC1_H2O2Hi        | <b>2.90</b>   | 2.55        |                                                                                                                                                                                                                                                                                                     |
| MBP1               | <b>3.81</b>   | 1.59        |                                                                                                                                                                                                                                                                                                     |
| MCM1               | <b>4.39</b>   | 2.16        |                                                                                                                                                                                                                                                                                                     |
| MET31              | <b>4.11</b>   | 3.26        |                                                                                                                                                                                                                                                                                                     |
| <b>MET32</b>       | <b>2.58</b>   | <b>2.10</b> | The top-3 motif is correct, whose score is <b>1.97</b> . The top-1 motif is actually the binding site of CBF1, and top-2 motif is similar to the top-1.                                                                                                                                             |
| MET4               | <b>11.19</b>  | 8.15        |                                                                                                                                                                                                                                                                                                     |
| <b>MIG1</b>        | <b>Failed</b> |             |                                                                                                                                                                                                                                                                                                     |
| MIG2               | <b>4.54</b>   | 4.23        | The top-1 motif is correct, but its score is only slightly better than the top-2 score.                                                                                                                                                                                                             |
| <b>MSN4_H2O2Hi</b> | <b>0.99</b>   | <b>0.77</b> | The top-3 motif is correct, whose score is <b>0.72</b> .                                                                                                                                                                                                                                            |
| RAP1               | <b>2.20</b>   | <b>1.85</b> |  <p>Top-1: , Top-2: . Both are correct.</p> |
| REB1               | <b>9.98</b>   | 3.87        |                                                                                                                                                                                                                                                                                                     |
| RLM1               | <b>0.51</b>   | 0.49        | The top-1 motif is correct, but its score is only slightly better than the top-2 score.                                                                                                                                                                                                             |
| SMP1               | <b>0.51</b>   | 0.50        | The top-1 motif is correct, but its score is only slightly better than the top-2 score.                                                                                                                                                                                                             |
| STB1               | <b>4.61</b>   | 4.51        | The top-1 motif is correct, but its score is only slightly better than the top-2 score.                                                                                                                                                                                                             |
| STE12              | <b>4.50</b>   | 0.41        |                                                                                                                                                                                                                                                                                                     |
| SWI4               | <b>3.21</b>   | 2.29        |                                                                                                                                                                                                                                                                                                     |
| SWI5               | <b>0.71</b>   | 0.29        |                                                                                                                                                                                                                                                                                                     |
| <b>TEC1</b>        | <b>1.35</b>   | <b>0.77</b> | The top-2 motif is correct.                                                                                                                                                                                                                                                                         |
