# Supplementary material
Source: PubMed Central journal article supplement (PMC2268170)

ABF1

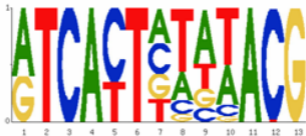

GAL4

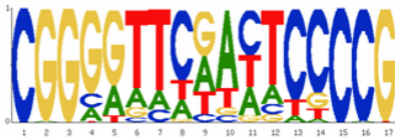

Supplement: supp_0712188105_12188Fig4.pdf [file supp_0712188105_12188Fig4.pdf]
